# Supplementary material
Source: Springer Nature journal article supplement (https://www.springermedizin.de/resource/supplementary/12936_2008_620_MOESM10_ESM.pdf/9547840)
Supplement: MOESM10 [file 9547840]

## Prevalence of fever episodes among under-five children by utilization of net.

| Use of net           | Child had fever in the last 2 weeks |      |      |      |       |     | *OR  | 95% CI**    | p-value |
|----------------------|-------------------------------------|------|------|------|-------|-----|------|-------------|---------|
|                      | Yes                                 |      | No   |      | Total |     |      |             |         |
|                      | n                                   | %    | n    | %    | n     | %   |      |             |         |
| Under-5 used any net |                                     |      |      |      |       |     |      |             |         |
| Yes                  | 133                                 | 32.4 | 276  | 67.6 | 411   | 100 |      |             |         |
| No                   | 829                                 | 26.6 | 2293 | 73.4 | 3122  | 100 | 1.32 | 1.05 - 1.66 | 0.013   |
| Total                | 962                                 | 27.2 | 2571 | 72.8 | 3533  | 100 |      |             |         |
| Under-5 used ITN     |                                     |      |      |      |       |     |      |             |         |
| Yes                  | 26                                  | 42.6 | 35   | 57.4 | 61    | 100 |      |             |         |
| No                   | 936                                 | 27.0 | 2536 | 73.0 | 3472  | 100 | 2.01 | 1.16 - 3.46 | 0.006   |
| Total                | 962                                 | 27.2 | 2571 | 72.8 | 3533  | 100 |      |             |         |
| Under-5 used ITN     |                                     |      |      |      |       |     |      |             |         |
| Yes                  | 26                                  | 42.6 | 35   | 57.4 | 61    | 100 |      |             |         |
| No                   | 107                                 | 30.6 | 243  | 69.4 | 350   | 100 | 1.69 | 0.97 - 2.94 | 0.063   |
| Total                | 133                                 | 32.4 | 278  | 67.6 | 411   | 100 |      |             |         |

\*OR, Odds ratio \*\*CI, confidence interval
